# Supplementary material
Source: PubMed Central journal article supplement (PMC5953759)
Supplement: NIHMS911841-supplement-supplement_1.pdf [file NIHMS911841-supplement-supplement_1.pdf]

## Supplementary Figure 1

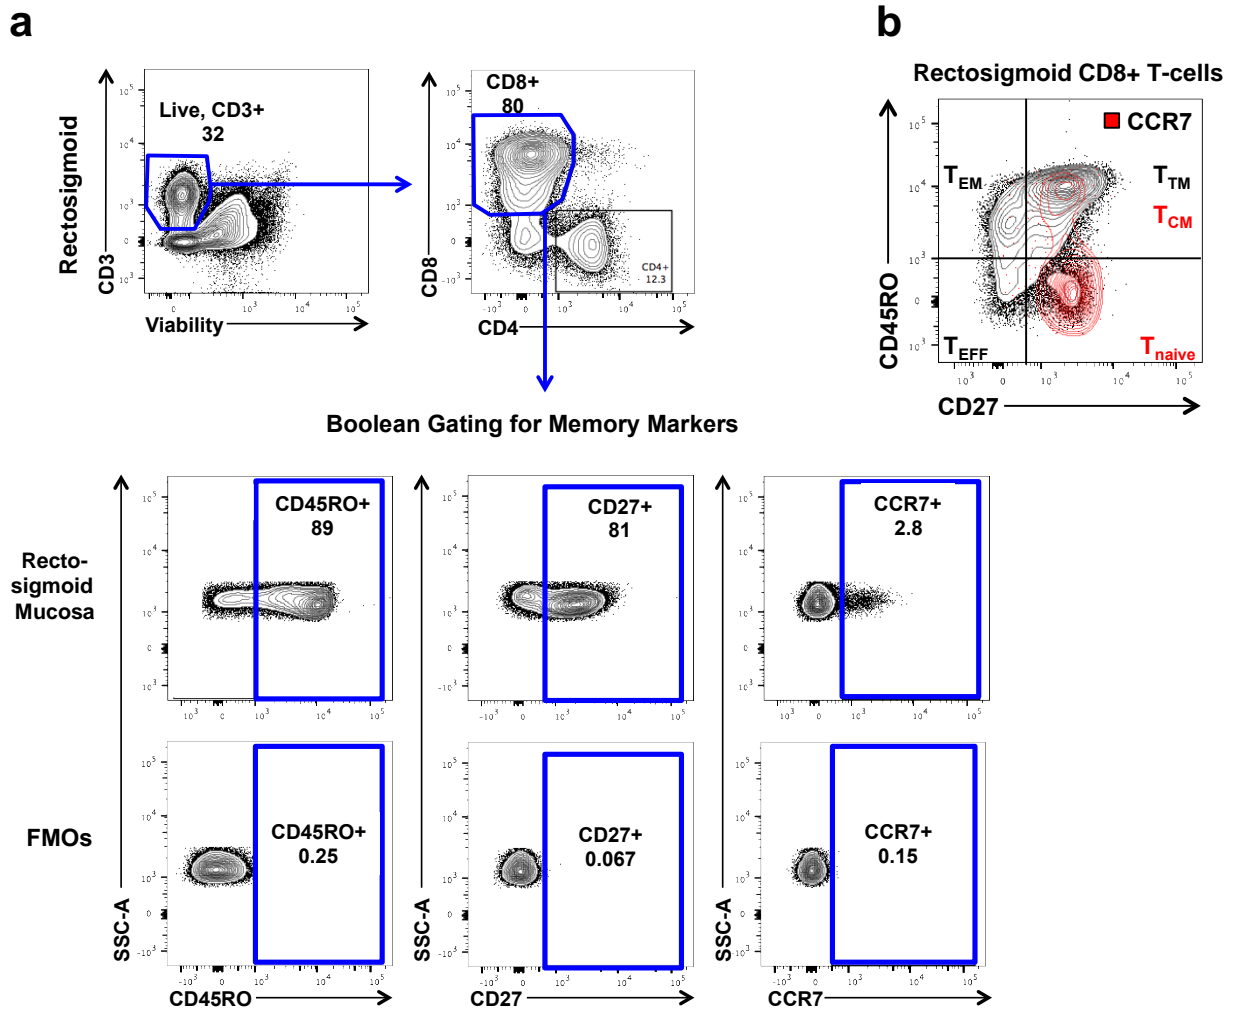

**Supplementary Figure 1.** Gating strategy for CD8<sup>+</sup> T-cell memory subsets in the human rectosigmoid mucosa. **(a)** Representative flow cytometry plot showing gating strategy used to identify live, CD3<sup>+</sup>, CD8<sup>+</sup> T-cell memory subsets in the mucosa. Memory subsets were defined by first establishing positive gates for each memory marker within the live, CD3<sup>+</sup>, CD8<sup>+</sup> T-cell population followed by Boolean gating to define memory subsets as follows: naïve ( $T_{naive}$  CD45RO<sup>-</sup>CD27<sup>+</sup>CCR7<sup>+</sup>), central memory ( $T_{CM}$  CD45RO<sup>+</sup>CD27<sup>+</sup>CCR7<sup>+</sup>), transitional memory ( $T_{TM}$  CD45RO<sup>+</sup>CD27<sup>+</sup>CCR7<sup>-</sup>), effector memory ( $T_{EM}$  CD45RO<sup>+</sup>CD27<sup>-</sup>CCR7<sup>-</sup>), and effector ( $T_{EFF}$  CD45RO<sup>-</sup>CD27<sup>-</sup>CCR7<sup>-</sup>). **(b)** Representative flow cytometry plot displaying the co-expression of CD45RO, CD27, and CCR7 in rectosigmoid CD8<sup>+</sup> T-cells.

## Supplementary Figure 2

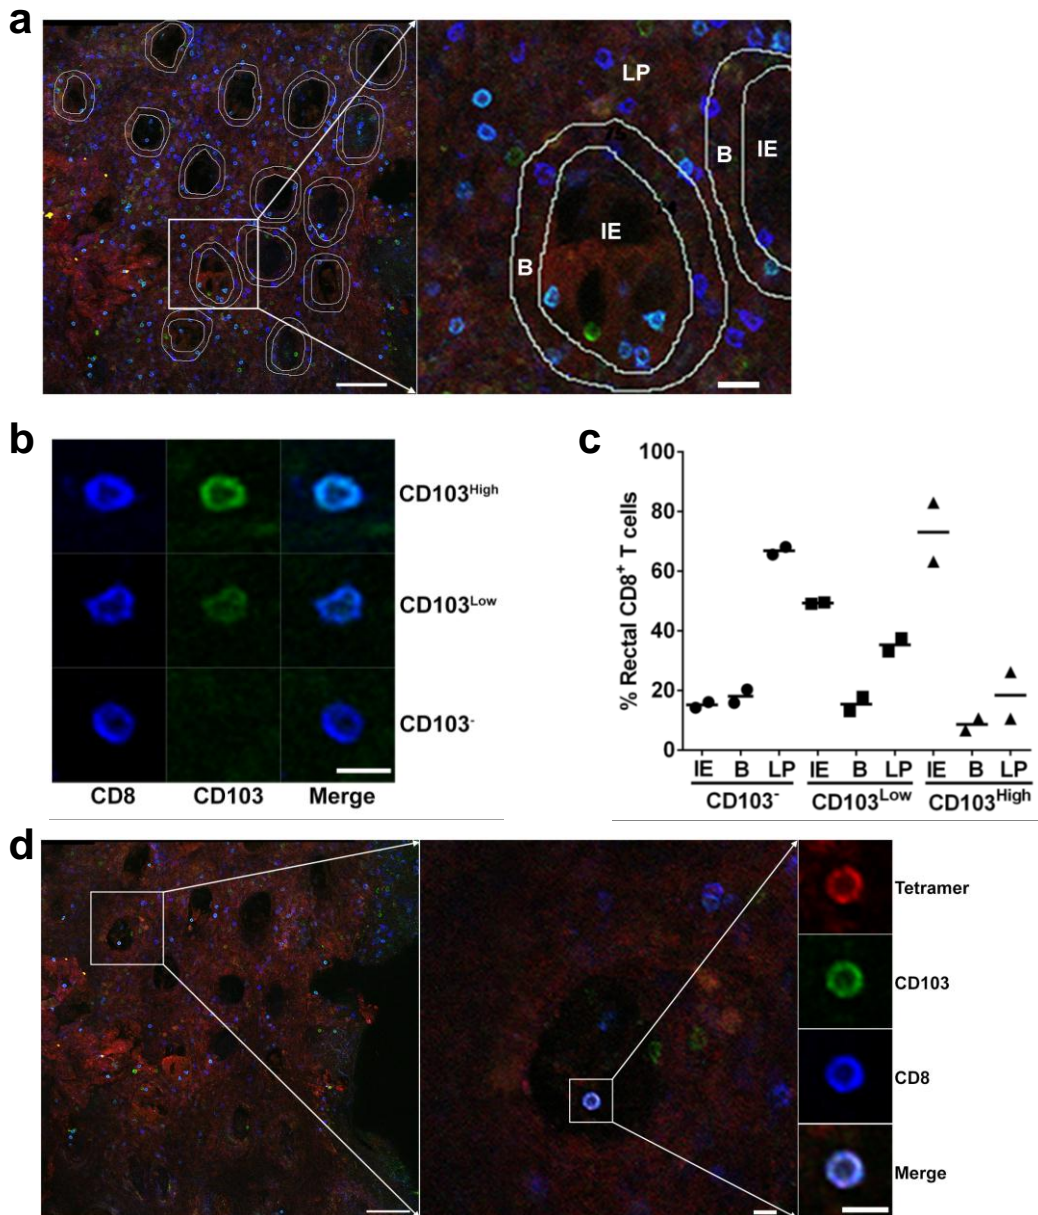

**Supplementary Figure 2.** Distribution of CD103<sup>-</sup>, CD103<sup>Low</sup> and CD103<sup>High</sup> CD8<sup>+</sup> T cells in rectosigmoid mucosa of HIV-1 controllers. **(a)** Representative tissue section illustrating delineation of compartments within the mucosa, including crypts with intraepithelial lymphocytes (IE), border areas (B) and lamina propria (LP). Stained with HLA-B\*57/Gag QW9 tetramers (red), CD8 antibodies (blue) and CD103 antibodies (green), the red background signal from tetramers was used to help delineate crypts. Confocal images were collected with a 20X objective. The scale bar indicates 100  $\mu$ m (left) and 20  $\mu$ m (right). **(b)** Representative rectosigmoid CD8<sup>+</sup> T cells (blue) from that were CD103<sup>-</sup>, CD103<sup>Low</sup> and CD103<sup>High</sup>. Scale bar indicates 10  $\mu$ m. **(c)** Percentage of CD103<sup>-</sup>, CD103<sup>Low</sup> and CD103<sup>High</sup> CD8<sup>+</sup> T cells in different anatomic compartments. **(d)** Representative epithelial CD103<sup>+</sup> HIV-specific CD8<sup>+</sup> T cell in rectosigmoid mucosa. Scale bar indicates 100, 10, and 10  $\mu$ m, respectively.

## Supplementary Figure 3

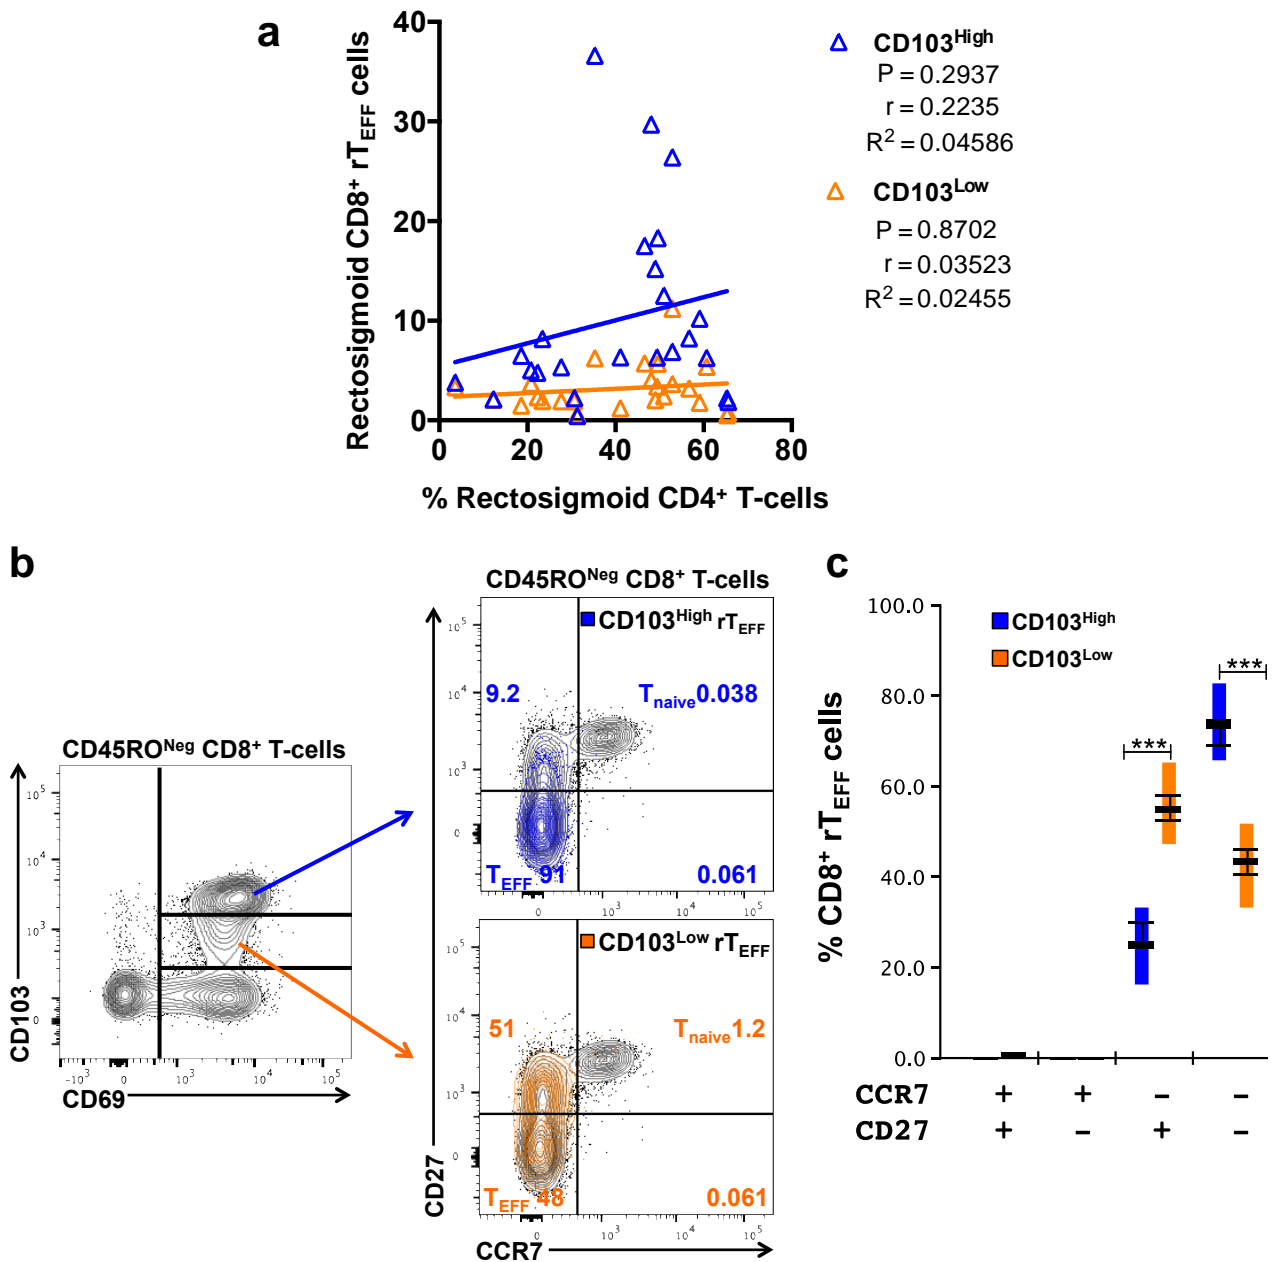

**Supplementary Figure 3.** Associations between CD103<sup>High</sup> and CD103<sup>Low</sup> CD8<sup>+</sup> rT<sub>EFF</sub>, expression of CD27 and abundance of rectosigmoid CD4<sup>+</sup> T-cells. **(a)** No significant correlations were observed between the percentage of rectosigmoid CD103<sup>High</sup> or CD103<sup>Low</sup> CD8<sup>+</sup> rT<sub>EFF</sub> and percentage of rectosigmoid CD4<sup>+</sup> T-cells. **(b)** Representative flow plot showing differences in expression of CD27 and CCR7 between CD103<sup>High</sup> and CD103<sup>Low</sup> CD8<sup>+</sup> rT<sub>EFF</sub> cells. **(c)** Frequencies of CD103<sup>High</sup> and CD103<sup>Low</sup> CD8<sup>+</sup> rT<sub>EFF</sub> expressing CD27 and CCR7 in all study participants. Non-parametric Spearman correlation and linear regression were used to calculate associations. Co-expression analysis was generated using SPICE software. Vertical bars represent interquartile ranges, horizontal bars represent medians, whiskers indicate standard error of the mean with level of significance: \* P < 0.05, \*\* P < 0.01, \*\*\* P < 0.001.

### Supplementary Figure 4

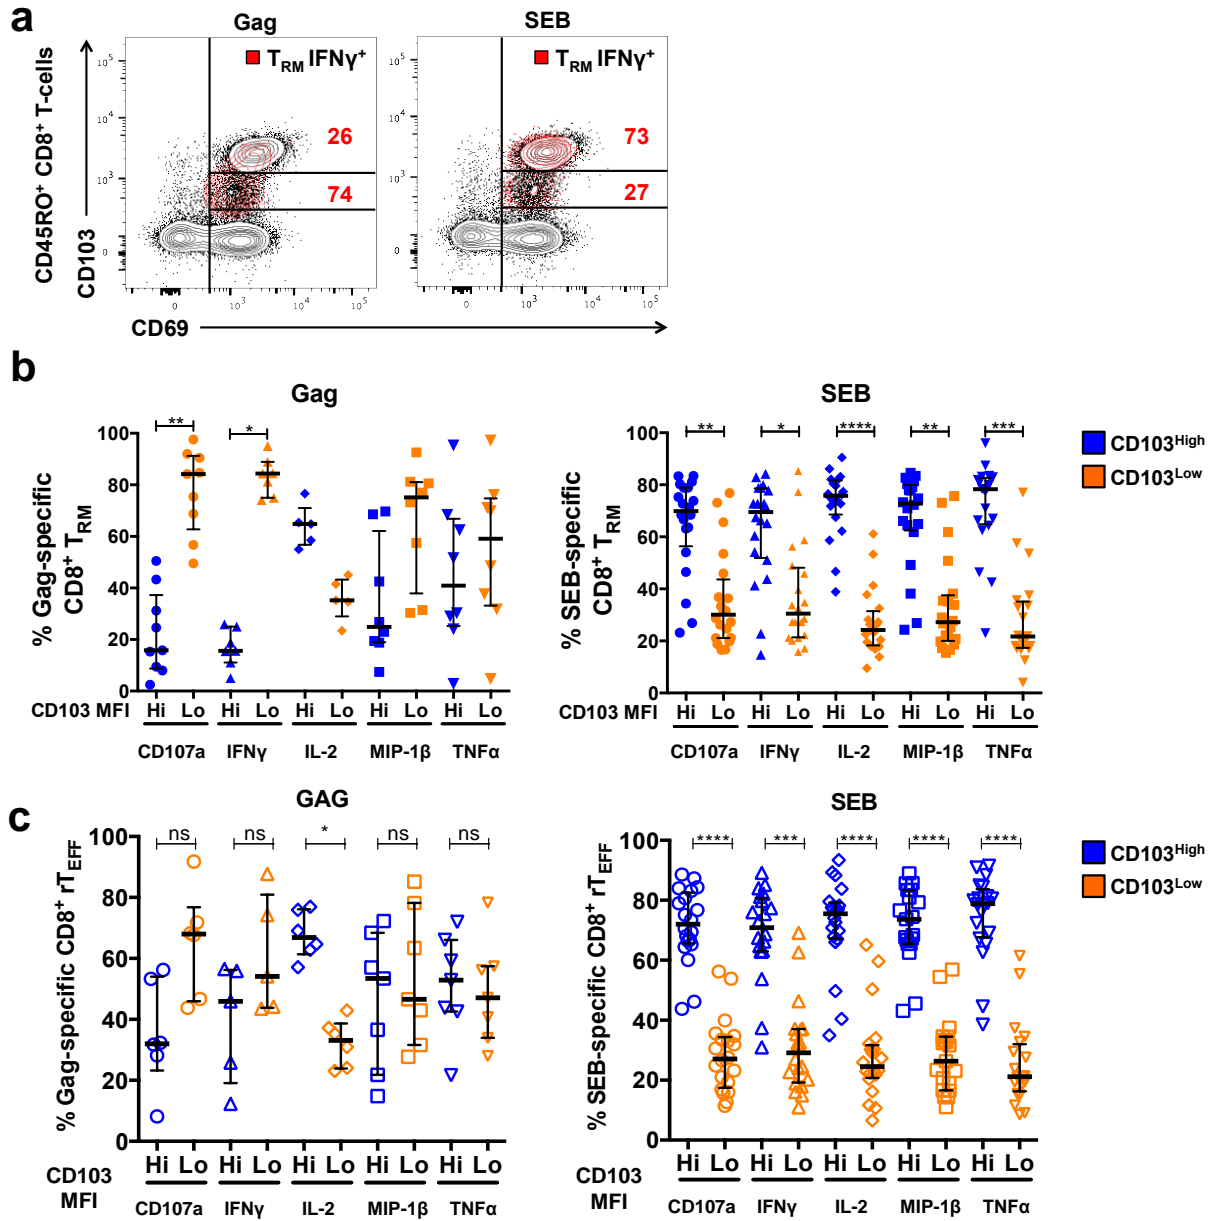

**Supplementary Figure 4.** Functionality and CD103 median fluorescence intensity (MFI) of CD8<sup>+</sup> T<sub>RM</sub> and rT<sub>EFF</sub> responding to antigenic stimulation. **(a)** Representative flow cytometry plot showing CD103 fluorescence intensity of rectosigmoid CD8<sup>+</sup> T<sub>RM</sub> producing IFN $\gamma$  in response to HIV-1 Gag-peptide pool (red, left) or SEB (red, right). **(b)** Differences in CD103 MFI among individual responses and between Gag- and SEB-responding CD8<sup>+</sup> T<sub>RM</sub> in a consolidated group of study participants. **(c)** Differences in CD103 MFI between individual responses and between Gag and SEB-responding CD8<sup>+</sup> rT<sub>EFF</sub>. Response data were generated using Boolean gating within live, CD3<sup>+</sup>, CD8<sup>+</sup>, CD45RO<sup>+</sup> or CD45RO<sup>Neg</sup>, CD103<sup>+</sup>CD69<sup>+</sup>S1PR1<sup>-</sup> cells. Horizontal bars represent medians, whiskers indicate interquartile ranges with level of significance indicated as follows: \* P < 0.05, \*\* P < 0.01, \*\*\* P < 0.001, \*\*\*\* P < 0.0001.

## Supplementary Figure 5

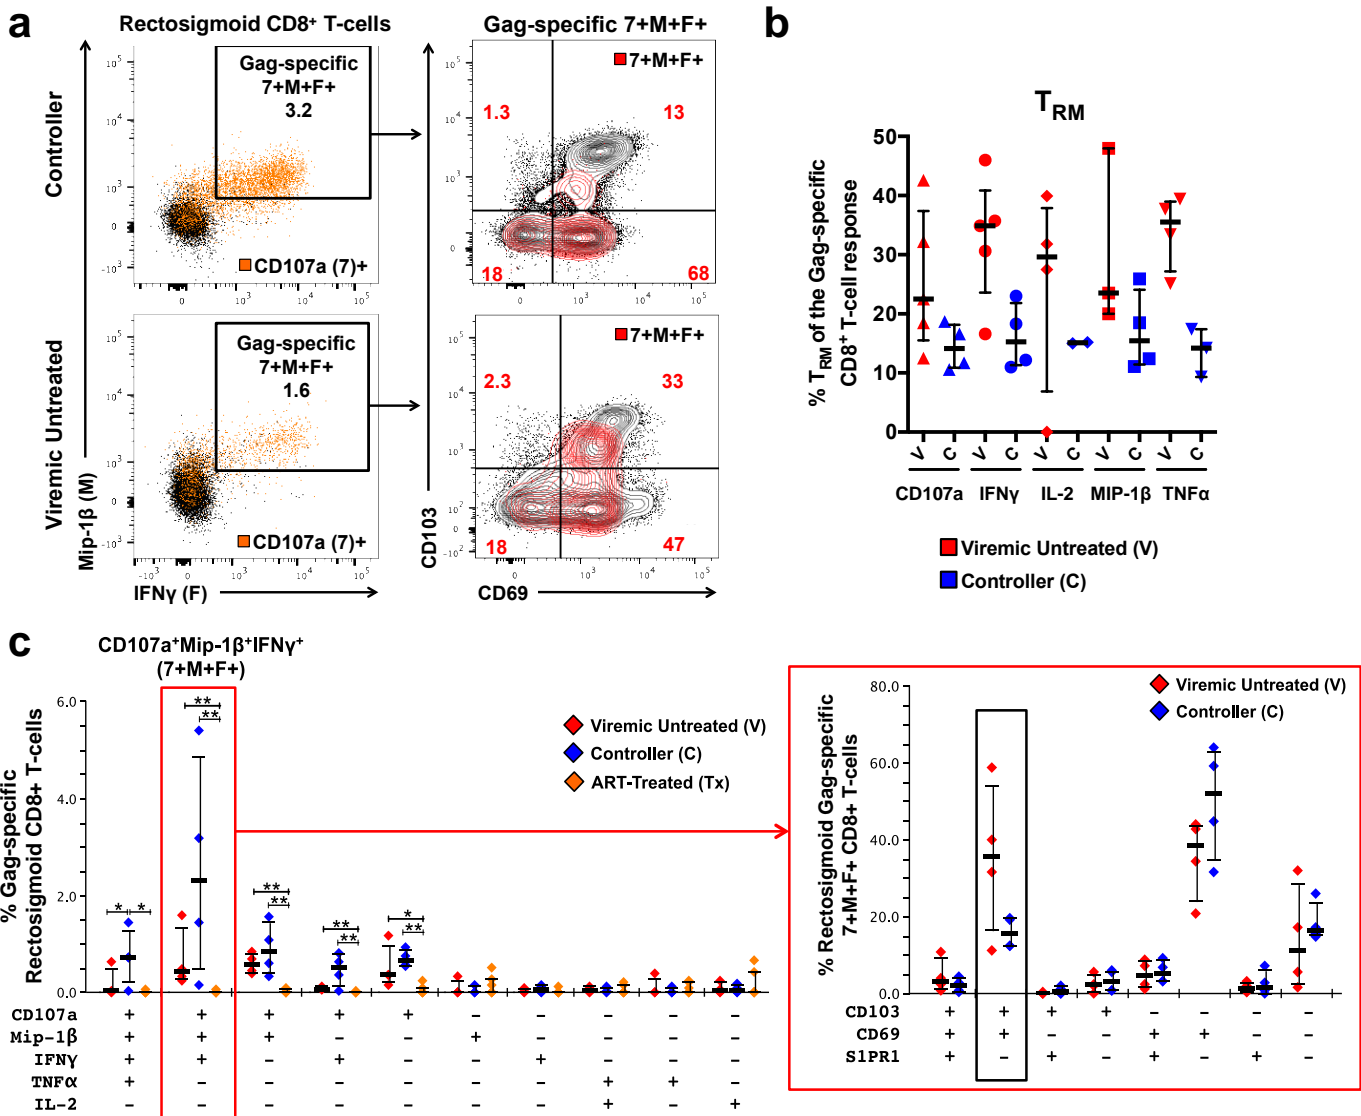

**Supplementary Figure 5.** Contribution of tissue-resident CD8<sup>+</sup> T-cells to the total rectosigmoid CD8<sup>+</sup> T-cell HIV-1 Gag-specific response varies across disease status. **(a)** Representative flow cytometry plot showing differences in CD103 and CD69 expression on rectosigmoid Gag-specific CD107a<sup>+</sup>MIP-1 $\beta$ <sup>+</sup>IFN $\gamma$ <sup>+</sup> (7<sup>+</sup>M<sup>+</sup>F<sup>+</sup>) CD8<sup>+</sup> T-cells between an HIV-1<sup>+</sup> controller (top) and an HIV-1<sup>+</sup> viremic participant not on ART (bottom). **(b)** Difference in the contribution of CD8<sup>+</sup> T<sub>RM</sub> to individual rectosigmoid Gag-specific CD8<sup>+</sup> T-cell responses between controllers and viremic individuals not on ART. **(c)** Difference in the expression of CD103, CD69, and S1PR1 on rectosigmoid Gag-specific CD107a<sup>+</sup>MIP-1 $\beta$ <sup>+</sup>IFN $\gamma$ <sup>+</sup> (7<sup>+</sup>M<sup>+</sup>F<sup>+</sup>) CD8<sup>+</sup> T-cells between controllers and viremic participants not on ART. Trends were conserved across all polyfunctional subsets analyzed (data not shown). Co-expression analysis was generated using SPICE software. Horizontal bars represent medians, whiskers indicate interquartile ranges with the level of significance indicated with asterisks: \* P < 0.05, \*\* P < 0.01.

### Supplementary Figure 6

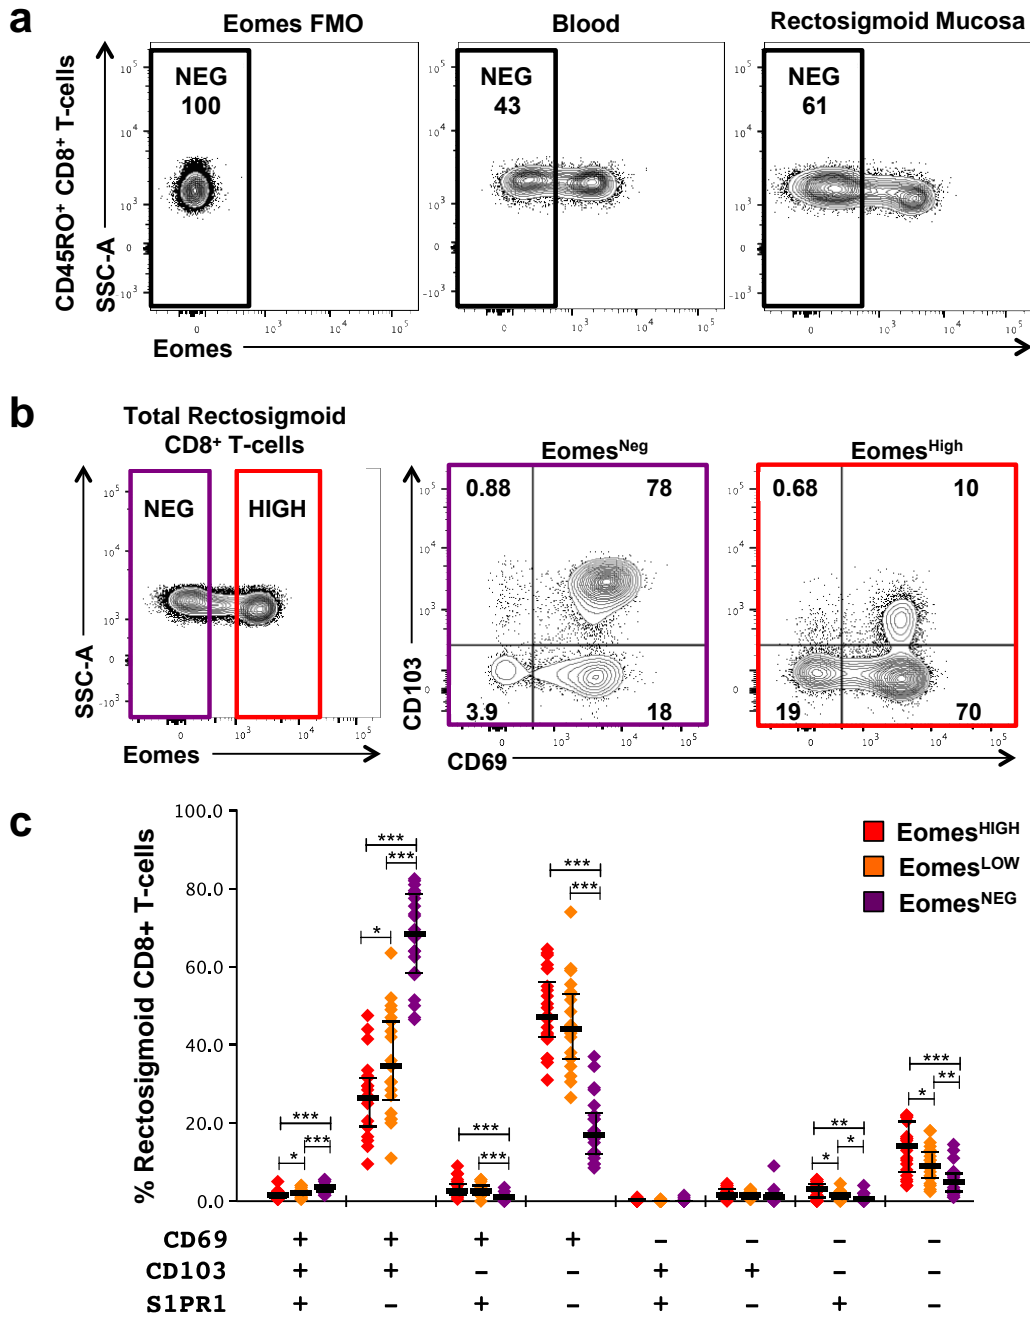

**Supplementary Figure 6.** Expression of Eomesodermin (Eomes) in rectosigmoid CD8<sup>+</sup> T-cells **(a)** Representative staining of blood and rectosigmoid CD45RO<sup>+</sup> CD8<sup>+</sup> T-cells gated using an Eomes fluorescence minus one control (FMO). **(b)** Representative expression of CD103 and CD69 on Eomes<sup>High</sup> and Eomes<sup>Neg</sup> rectosigmoid CD8<sup>+</sup> T-cells. **(c)** Co-expression of CD103, CD69, and S1PR1 on Eomes<sup>High/Low/Neg</sup> rectosigmoid CD8<sup>+</sup> T-cells in a group of chronically HIV-1<sup>+</sup> and seronegative participants. Whiskers indicate interquartile ranges. Level of significance is indicated with asterisks: \* P < 0.05, \*\* P < 0.01, \*\*\* P < 0.001.

## Supplementary Figure 7

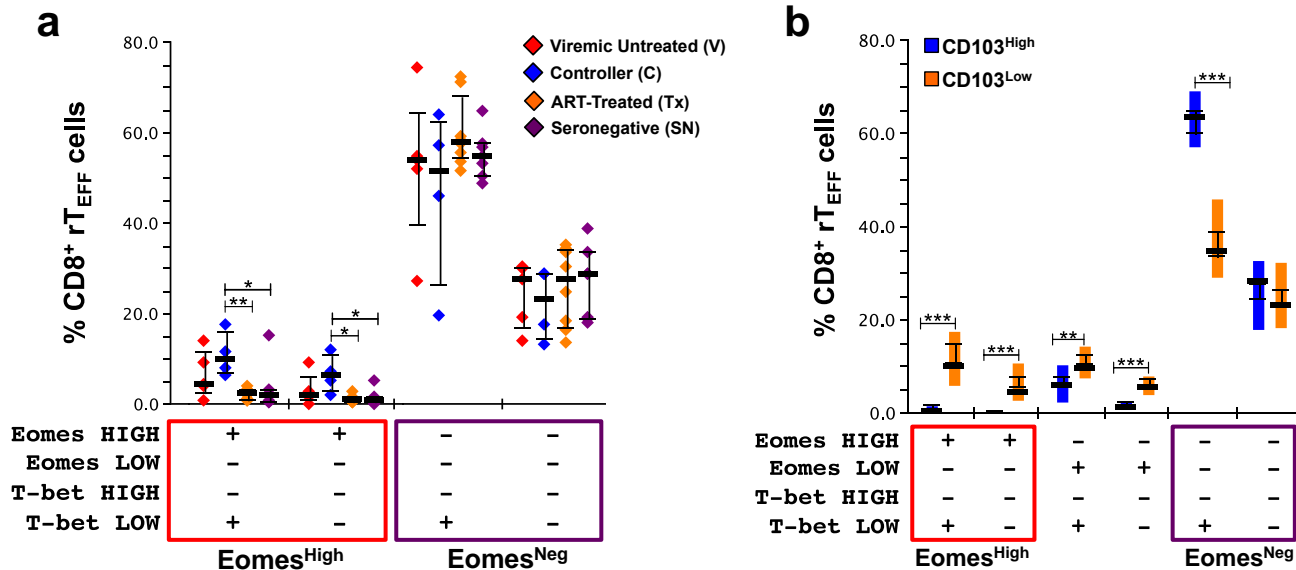

**Supplementary Figure 7.** Eomes expression in rectosigmoid CD8<sup>+</sup> rT<sub>EFF</sub> varies with HIV-1 disease status and CD103 expression intensity. **(a)** Differences in frequency of Eomes<sup>High</sup> and Eomes<sup>Neg</sup> rectosigmoid CD8<sup>+</sup> rT<sub>EFF</sub> across HIV-1 disease status. **(b)** Difference in expression of Eomes and T-bet between CD103<sup>High</sup> and CD103<sup>Low</sup> rectosigmoid CD8<sup>+</sup> rT<sub>EFF</sub> cells. Co-expression analyses were generated using SPICE software. Horizontal bars represent medians. In **(a)** whiskers indicate interquartile ranges; in **(b)** vertical bars represent interquartile ranges and whiskers indicate standard error of the mean. Level of significance is indicated with asterisks: \* P < 0.05, \*\* P < 0.01, \*\*\* P < 0.001.

## Supplementary Figure 8

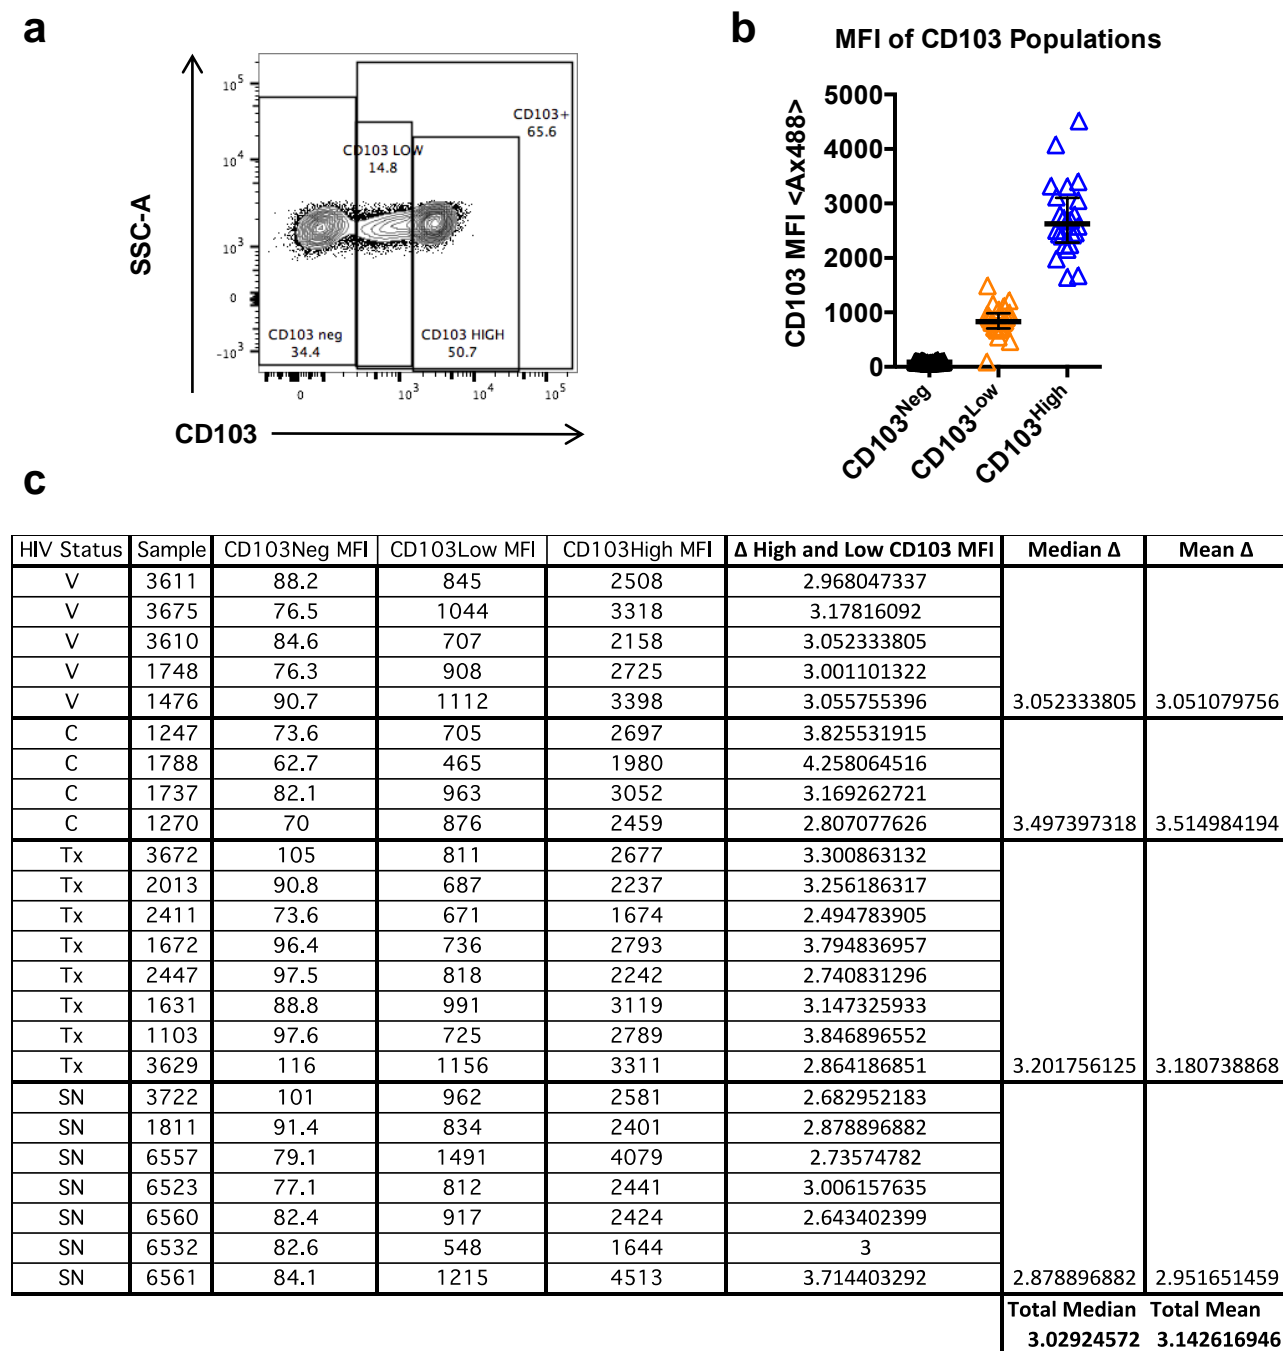

**Supplementary Figure 8.** The figure shows gating to distinguish between CD103neg, low and high populations. **(a)** Representative sample of rectosigmoid CD8<sup>+</sup> T-cells with side scatter on the y-axis and CD103 on the x-axis. Sample shown is from an HIV-1<sup>+</sup> viremic individual not on ART. **(b)** Summary of CD103 median fluorescence intensity (MFI) for negative, low and high gates, as detailed in the Table. **(c)** List of all samples analyzed, with MFI for CD103 negative, low and high gates. The median difference in MFI ( $\Delta$ MFI) between high and low CD103 gates for all samples was 3.02.
